# Supplementary material for: A machine learning approach for predicting the fluorination strength of electrophilic fluorinating reagents
Source: Royal Society of Chemistry journal article supplement (doi:10.1039/d2cp03281c), 2022-01-01
Supplement: d2cp03281c1.pdf [file d2cp03281c1.pdf]

# **Electronic Supplementary Information**

# **A Machine Learning Approach for Predicting the Fluorination Strength of Electrophilic Fluorinating Reagents**

**Vaneet Saini**

<sup>a</sup> *Department of Chemistry & Centre for Advanced Studies in Chemistry, Panjab University, Chandigarh 160014,*

*India, Email: [vsaini@pu.ac.in](mailto:vsaini@pu.ac.in)*

Orcid ID: [0000-0002-8186-5166](https://orcid.org/0000-0002-8186-5166)

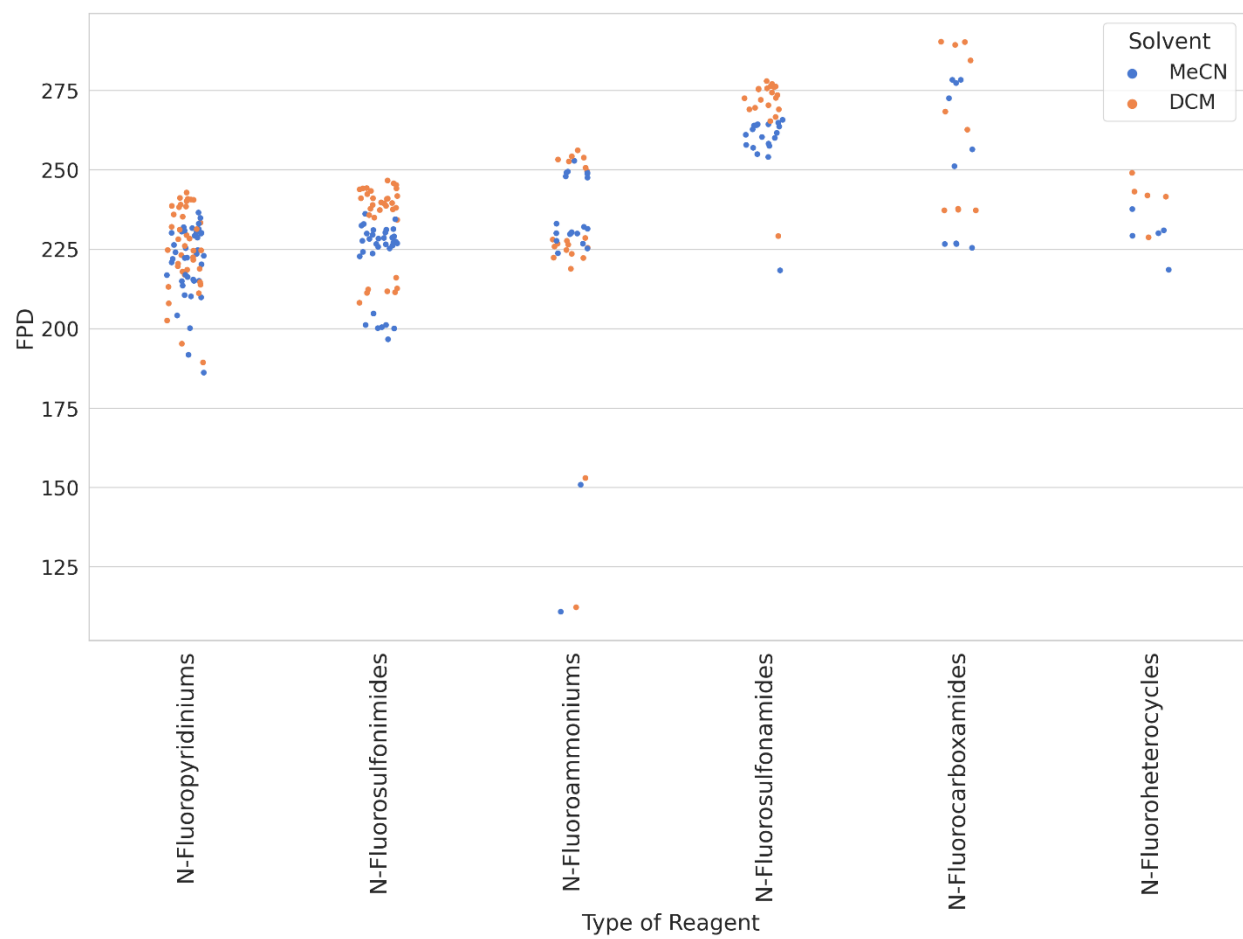

**Figure S1:** Plot showing distribution of FPD values across different categories of N-F fluorinating reagents.

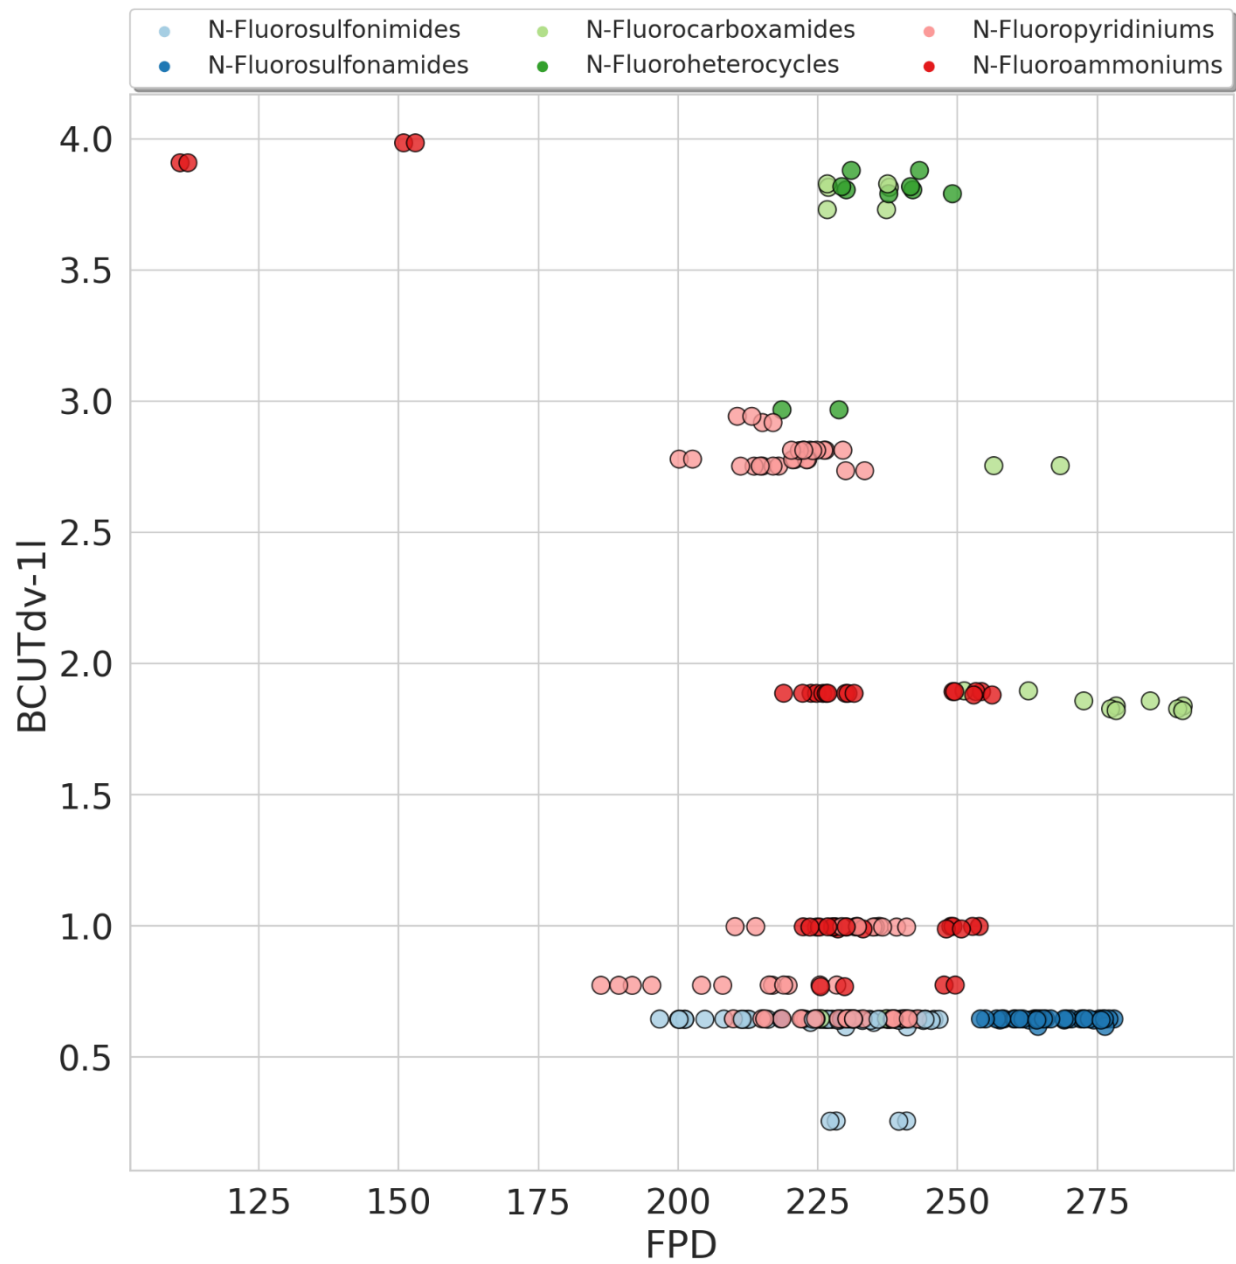

Figure S2. Scatter plot between BCUTdv-1I vs FPD.

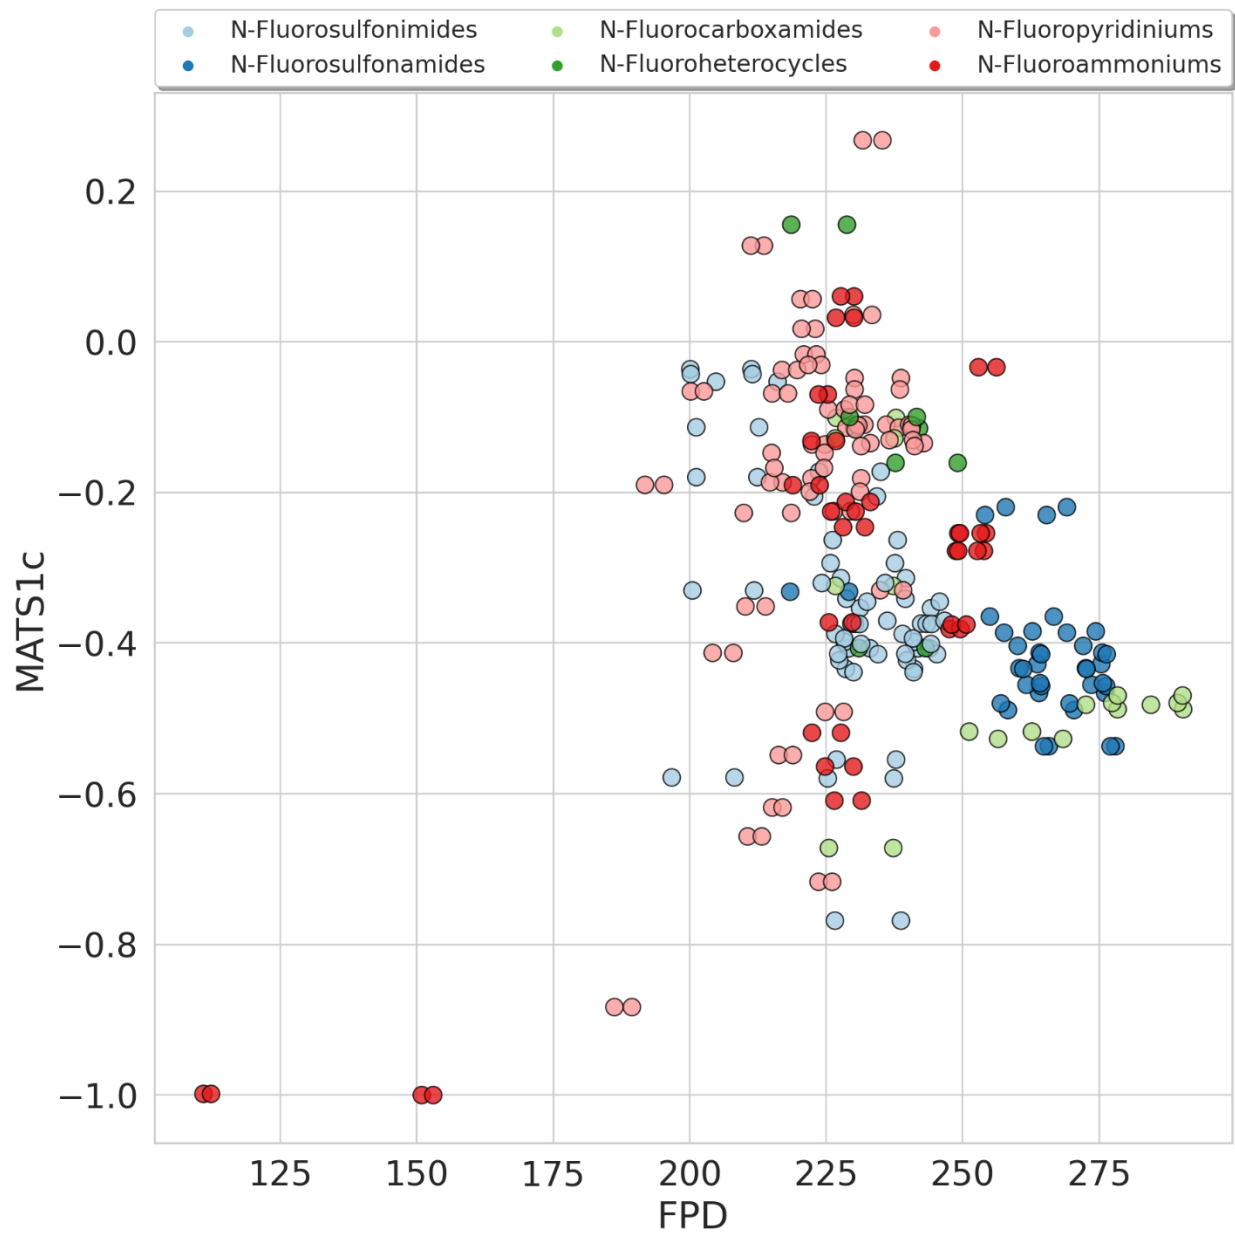

Figure S3. Scatter plot between MATS1c vs FPD.

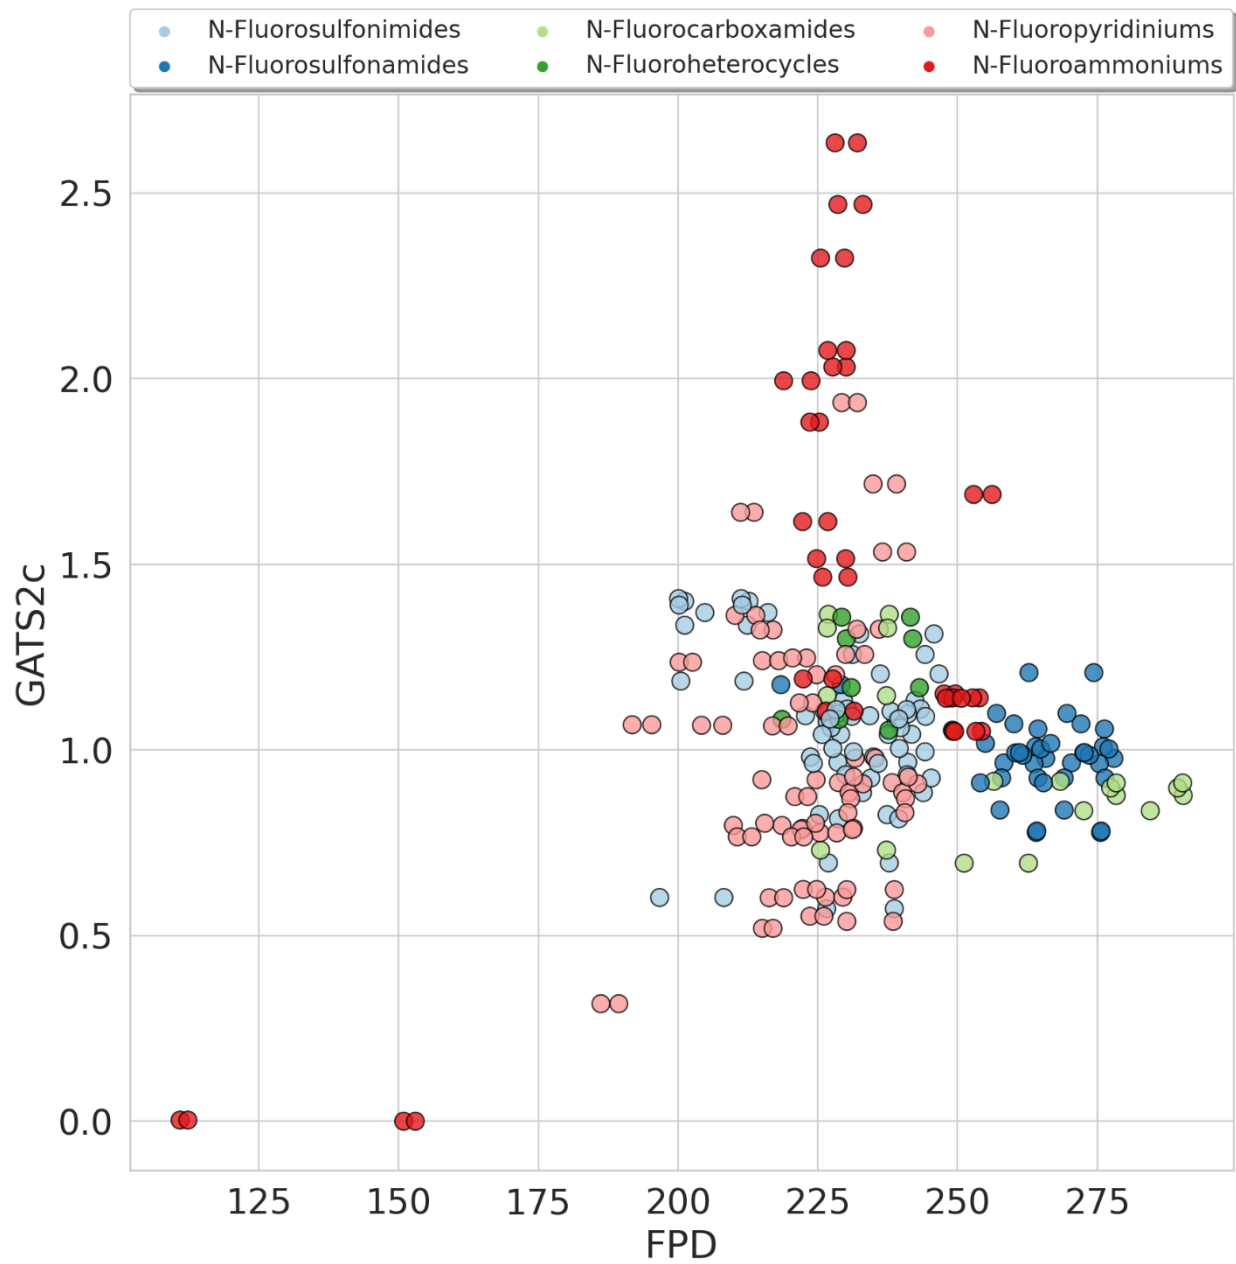

Figure S4. Scatter plot between GATS2c vs FPD.

**Table S1. Train test split data.**

| Type of Reagent      | Total no. of FPD values | No of FPD values | No of FPD values | %age of FPD values |
|----------------------|-------------------------|------------------|------------------|--------------------|
|                      |                         | Training set     | Test set         | Test set           |
| N-Fluoropyridiniums  | 80                      | 68               | 12               | 15%                |
| N-Fluorosulfonimides | 68                      | 58               | 10               | 14.7%              |
| N-Fluoroammoniums    | 42                      | 36               | 6                | 14.3%              |
| N-Fluorosulfonamides | 40                      | 34               | 6                | 15%                |
| N-Fluorocarboxamides | 20                      | 16               | 4                | 20%                |
| N-Fluoroheterocycles | 10                      | 8                | 2                | 20%                |
| Total                | 260                     | 220              | 40               | 15.4%              |

**Table S2. Model evaluation metrics using layered approach where each feature was added sequentially to the dataset and metrics were noted.**

| No. of desc.    | R <sup>2</sup> _cross-val | rmse_cross-val | R <sup>2</sup> _train | R <sup>2</sup> _test | rmse_test | Descriptor(s)                                                         |
|-----------------|---------------------------|----------------|-----------------------|----------------------|-----------|-----------------------------------------------------------------------|
| <b>NN Model</b> |                           |                |                       |                      |           |                                                                       |
| 3               | 0.844                     | 8.58           | 0.886                 | 0.923                | 5.81      | TOS + Solvent+BCUTc-1h                                                |
| 4               | 0.921                     | 6.62           | 0.941                 | 0.93                 | 5.56      | TOS + Solvent+BCUTc-1h+ BCUTdv-1l                                     |
| 5               | 0.955                     | 4.76           | 0.97                  | 0.93                 | 5.48      | TOS + Solvent+BCUTc-1h+ BCUTdv-1l + GATS2c                            |
| 6               | 0.963                     | 4.04           | 0.983                 | 0.967                | 3.84      | TOS + Solvent+BCUTc-1h+ BCUTdv-1l + GATS2c + MATS1c                   |
| 7               | 0.976                     | 2.84           | 0.995                 | 0.909                | 6.35      | TOS + Solvent+BCUTc-1h+ BCUTdv-1l + GATS2c + MATS1c + AATS0Z          |
| 8               | 0.99                      | 2.28           | 0.997                 | 0.927                | 5.7       | TOS + Solvent+BCUTc-1h+ BCUTdv-1l + GATS2c + MATS1c + AATS0Z + MATS2d |
| <b>RF Model</b> |                           |                |                       |                      |           |                                                                       |
| 3               | 0.791                     | 10.82          | 0.984                 | 0.813                | 9.04      | TOS + Solvent+BCUTc-1h                                                |
| 4               | 0.896                     | 7.49           | 0.984                 | 0.908                | 6.37      | TOS + Solvent+BCUTc-1h+ BCUTdv-1l                                     |
| 5               | 0.923                     | 6.3            | 0.992                 | 0.91                 | 6.27      | TOS + Solvent+BCUTc-1h+ BCUTdv-1l + GATS2c                            |
| 6               | 0.916                     | 7.03           | 0.992                 | 0.915                | 6.12      | TOS + Solvent+BCUTc-1h+ BCUTdv-1l + GATS2c + MATS1c                   |
| 7               | 0.921                     | 6.58           | 0.988                 | 0.788                | 9.69      | TOS + Solvent+BCUTc-1h+ BCUTdv-1l + GATS2c + MATS1c + AATS0Z          |
| 8               | 0.933                     | 6.27           | 0.992                 | 0.787                | 9.7       | TOS + Solvent+BCUTc-1h+ BCUTdv-1l + GATS2c + MATS1c + AATS0Z + MATS2d |



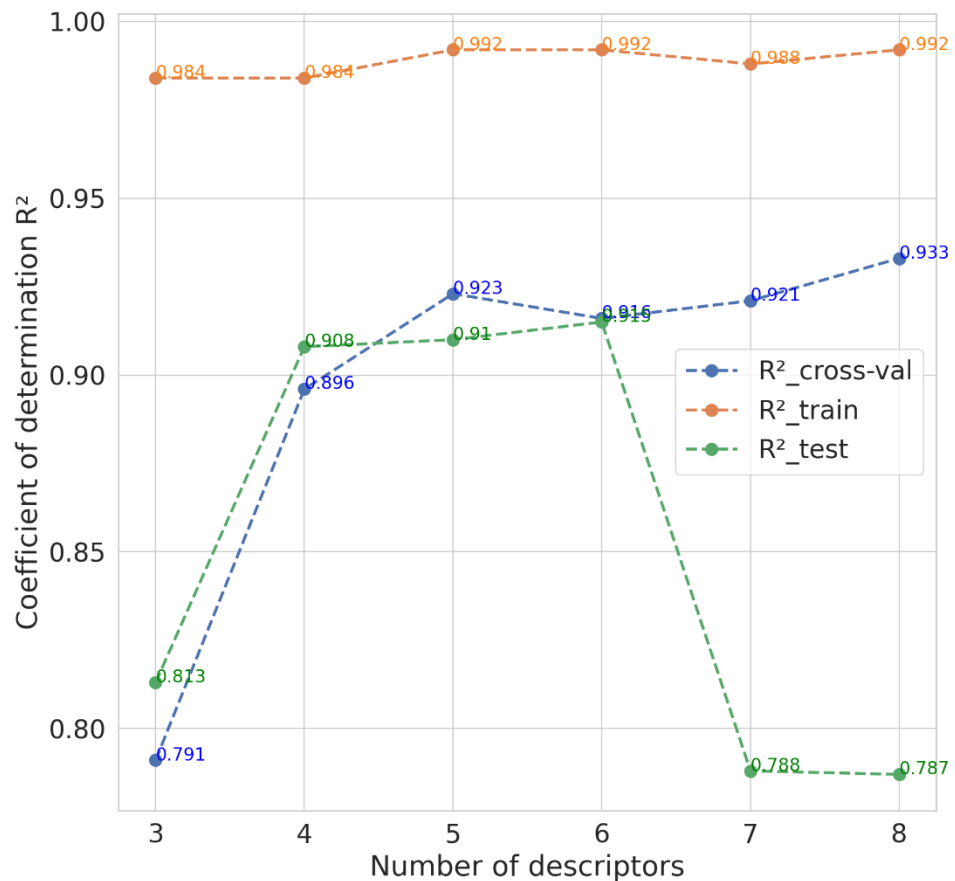

**Figure S5.** Plot describing  $R^2$  scores for layered approach for the RF model, where x axis represents total number of descriptors (3 = 'TOR' + Solvent + BCUTc-1h; 4 = 3 + BCUTdv-1l; 5 = 4 + GATS2c; 6 = 5 + MATS1c; 7 = 6 + AATS0Z; 8 = 7 + MATS2d).

**Table S3. Actual and predicted FPD values along with the absolute error for test set predictions for NN model.**

| Name of the Reagent                                                                        | Type of Reagent      | Solvent | Actual | Predicted | Abs. Error |
|--------------------------------------------------------------------------------------------|----------------------|---------|--------|-----------|------------|
| 1-fluoro-4-nitropyridin-1-ium                                                              | N-Fluoropyridiniums  | DCM     | 222.5  | 222.4     | 0.1        |
| 1-fluoro-2,4,6-trimethylpyridin-1-ium                                                      | N-Fluoropyridiniums  | MeCN    | 236.6  | 236.7     | 0.1        |
| 1-fluoroquinuclidin-1-ium                                                                  | N-Fluoroammoniums    | DCM     | 256.2  | 256.1     | 0.1        |
| 2-fluoro-2H-benzo[d][1,3,2]dithiazole 1,1,3,3-tetraoxide                                   | N-Fluorosulfonimides | DCM     | 235.8  | 236.1     | 0.3        |
| 1,3,3,4,4-pentafluoropyrrolidine-2,5-dione                                                 | N-Fluorocarboxamides | DCM     | 237.5  | 237.9     | 0.4        |
| 1-fluoro-2,4,6-trimethylpyridin-1-ium                                                      | N-Fluoropyridiniums  | DCM     | 240.9  | 240.5     | 0.4        |
| 2-fluoro-2H-benzo[d][1,3,2]dithiazole 1,1,3,3-tetraoxide                                   | N-Fluorosulfonimides | MeCN    | 224.2  | 224.6     | 0.4        |
| 2-fluoro-3,3-dimethyl-6-nitro-2,3-dihydrobenzo[d]isothiazole 1,1-dioxide                   | N-Fluorosulfonamides | MeCN    | 254.1  | 254.6     | 0.5        |
| 4-(tert-butyl)-1-fluoropyridin-1-ium-2-sulfonate                                           | N-Fluoropyridiniums  | MeCN    | 231.4  | 230.7     | 0.7        |
| 1-fluoro-4-hydroxy-1,4-diazabicyclo[2.2.2]octane-1,4-dium                                  | N-Fluoroammoniums    | MeCN    | 226.8  | 225.9     | 0.9        |
| (1S,2S,4S)-1-fluoro-4-methyl-2,3-diphenyl-1,4-diazabicyclo[2.2.2]octane-1,4-dium           | N-Fluoroammoniums    | DCM     | 226.8  | 225.9     | 0.9        |
| (6R,7aS)-1-fluoro-7a,8,8-trimethylhexahydro-3H-3a,6-methanobenzo[c]isothiazole 2,2-dioxide | N-Fluorosulfonamides | DCM     | 275.7  | 274.5     | 1.2        |
| 2-fluoro-3,3-dimethyl-6-nitro-2,3-dihydrobenzo[d]isothiazole 1,1-dioxide                   | N-Fluorosulfonamides | DCM     | 265.4  | 264.2     | 1.2        |
| (6R,7aS)-1-fluoro-7a,8,8-trimethylhexahydro-3H-3a,6-methanobenzo[c]isothiazole 2,2-dioxide | N-Fluorosulfonamides | MeCN    | 264.2  | 263.0     | 1.2        |
| perfluoropiperidine                                                                        | N-Fluoroheterocycles | DCM     | 241.6  | 242.8     | 1.2        |
| 1-fluoro-2,6-bis(methoxymethyl)pyridin-1-ium                                               | N-Fluoropyridiniums  | DCM     | 232.1  | 233.4     | 1.3        |
| perfluoro-1,3,2-dithiazinane 1,1,3,3-tetraoxide                                            | N-Fluorosulfonimides | MeCN    | 200.2  | 201.5     | 1.3        |
| (1S,2S,4S)-1-fluoro-4-methyl-2,3-diphenyl-1,4-diazabicyclo[2.2.2]octane-1,4-dium           | N-Fluoroammoniums    | MeCN    | 230.1  | 228.6     | 1.5        |
| perfluoropiperidine                                                                        | N-Fluoroheterocycles | MeCN    | 229.3  | 230.8     | 1.5        |

|                                                                              |                      |      |       |       |      |
|------------------------------------------------------------------------------|----------------------|------|-------|-------|------|
| 1-fluoroazocan-2-one                                                         | N-Fluorocarboxamides | MeCN | 278.4 | 276.8 | 1.6  |
| 1-fluoro-2,6-bis(methoxymethyl)pyridin-1-ium                                 | N-Fluoropyridiniums  | MeCN | 229.3 | 231.0 | 1.7  |
| perfluoro-1,3,2-dithiazinane 1,1,3,3-tetraoxide                              | N-Fluorosulfonimides | DCM  | 211.5 | 213.4 | 1.9  |
| 1-fluoro-4-hydroxy-1,4-diazabicyclo[2.2.2]octane-1,4-dium                    | N-Fluoroammoniums    | DCM  | 222.3 | 220.3 | 2.0  |
| 1,3,3,4,4-pentafluoropyrrolidine-2,5-dione                                   | N-Fluorocarboxamides | MeCN | 226.7 | 228.8 | 2.1  |
| 4-(tert-butyl)-1-fluoropyridin-1-ium-2-sulfonate                             | N-Fluoropyridiniums  | DCM  | 241.2 | 238.9 | 2.3  |
| 4-bromo-N-fluoro-N-(phenylsulfonyl)benzenesulfonamide                        | N-Fluorosulfonimides | MeCN | 228.3 | 230.8 | 2.5  |
| 1-fluoro-4-nitropyridin-1-ium                                                | N-Fluoropyridiniums  | MeCN | 220.3 | 217.7 | 2.6  |
| 4-bromo-N-fluoro-N-(phenylsulfonyl)benzenesulfonamide                        | N-Fluorosulfonimides | DCM  | 240.9 | 243.9 | 3.0  |
| N-fluoro-N,4-dimethylbenzenesulfonamide                                      | N-Fluorosulfonamide  | MeCN | 264.4 | 261.2 | 3.2  |
| 1-fluoroazocan-2-one                                                         | N-Fluorocarboxamides | DCM  | 290.3 | 287.0 | 3.3  |
| N-fluoro-N,4-dimethylbenzenesulfonamide                                      | N-Fluorosulfonamide  | DCM  | 276.3 | 273.0 | 3.3  |
| 1-fluoroquinuclidin-1-ium                                                    | N-Fluoroammoniums    | MeCN | 252.9 | 249.5 | 3.4  |
| 4-(tert-butyl)-N-((4-(tert-butyl)phenyl)sulfonyl)-N-fluorobenzenesulfonamide | N-Fluorosulfonimides | MeCN | 231.4 | 228.0 | 3.4  |
| 4-bromo-N-((4-bromophenyl)sulfonyl)-N-fluorobenzenesulfonamide               | N-Fluorosulfonimides | MeCN | 227.2 | 230.9 | 3.7  |
| 4-bromo-N-((4-bromophenyl)sulfonyl)-N-fluorobenzenesulfonamide               | N-Fluorosulfonimides | DCM  | 239.5 | 243.7 | 4.2  |
| 4-(tert-butyl)-N-((4-(tert-butyl)phenyl)sulfonyl)-N-fluorobenzenesulfonamide | N-Fluorosulfonimides | DCM  | 244.2 | 239.6 | 4.6  |
| 3-chloro-1-fluoro-5-(trifluoromethyl)pyridin-1-ium-2-sulfonate               | N-Fluoropyridiniums  | MeCN | 215.5 | 220.7 | 5.2  |
| 3-chloro-1-fluoro-5-(trifluoromethyl)pyridin-1-ium-2-sulfonate               | N-Fluoropyridiniums  | DCM  | 224.6 | 230.9 | 6.3  |
| 2,6-dicyano-1-fluoropyridin-1-ium                                            | N-Fluoropyridiniums  | DCM  | 202.6 | 215.1 | 12.5 |
| 2,6-dicyano-1-fluoropyridin-1-ium                                            | N-Fluoropyridiniums  | MeCN | 200.2 | 214.3 | 14.1 |
| Average                                                                      |                      |      |       |       | 2.6  |
